# Supplementary material for: Dual-targeting hybrid nanoparticles for the delivery of SN38 to Her2 and CD44 overexpressed human gastric cancer
Source: Royal Society of Chemistry journal article supplement (doi:10.1039/c6nr01749e), 2016-01-01
Supplement: c6nr01749e1.pdf [file c6nr01749e1.pdf]

## Supplementary Information

---

*For the Article*

### **Dual-targeting Hybrid Nanoparticles for SN38 delivery to Her2 and CD44 overexpressed Human Gastric Cancer**

Zhe Yang<sup>1,†</sup>, Huiyan Luo<sup>1,2,†</sup>, Zhong Cao<sup>1</sup>, Ya Chen<sup>1</sup>, Jinbiao Gao<sup>1</sup>, Yingqin Li<sup>1</sup>, Qing  
Jiang<sup>1</sup>, Ruihua Xu<sup>2,\*</sup>, Jie Liu<sup>1,\*</sup>

<sup>1</sup> *Department of Biomedical Engineering, School of Engineering, Sun Yat-sen University, Guangzhou, Guangdong 510006, China*

<sup>2</sup> *Department of Medical Oncology, Sun Yat-sen University Cancer Center; State Key Laboratory of Oncology in South China; Collaborative Innovation Center for Cancer Medicine, Guangzhou 510060, China*

† These authors contribute equally to this work.

\* E-mail: liujie56@mail.sysu.edu.cn

xurh@sysucc.org.cn

Figure S1

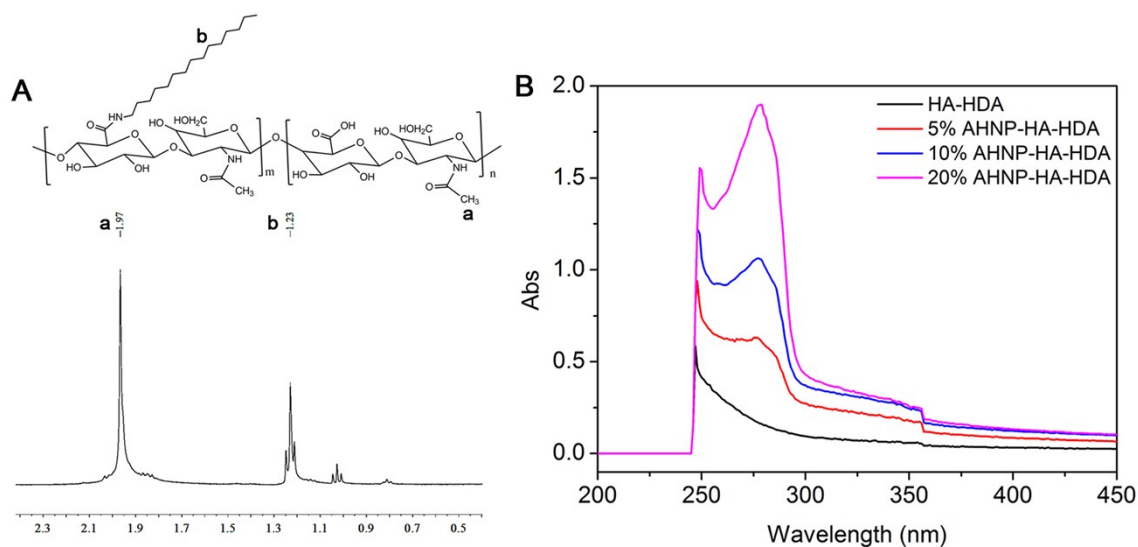

**Figure S1.** Characterization of the composition of the HA-HDA and the AHNP-HA-HDA. (A) The <sup>1</sup>H-NMR of HA-HDA. (B) The UV-Vis spectrums of HA-HDA and AHNP-HA-HDA with varying AHNP conjugation percent.

## Supplementary Information

Figure S2

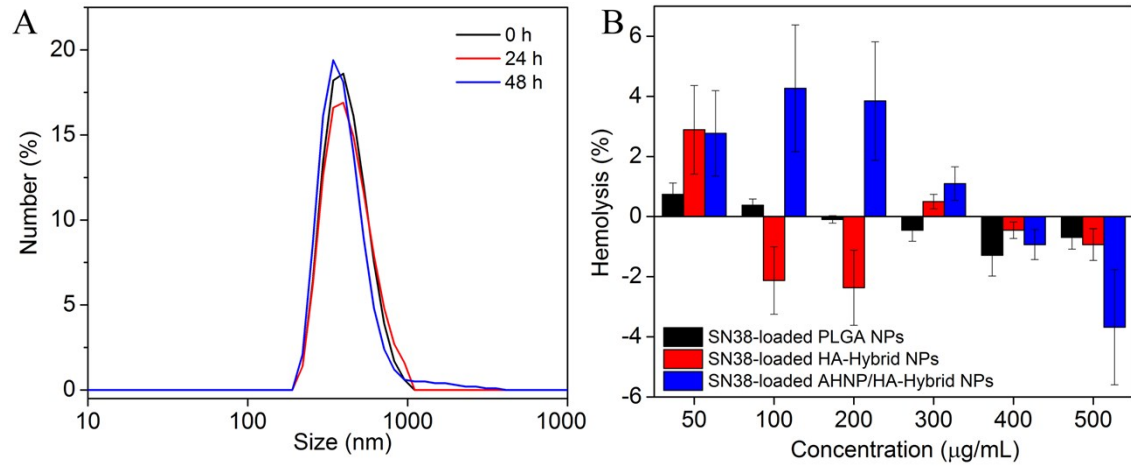

**Figure S2.** (A) The particle size distribution of the SN38-loaded AHNP/HA-hybrid NPs incubated in PBS (pH=7.4, 0.01 M) containing 10% FBS at different time intervals. (B) Hemolytic activity of SN38-loaded NPs with varying NP concentrations after incubation with erythrocytes for 12 h. Data are given as mean  $\pm$  SD (n = 3).

## Supplementary Information

---

**Figure S3**

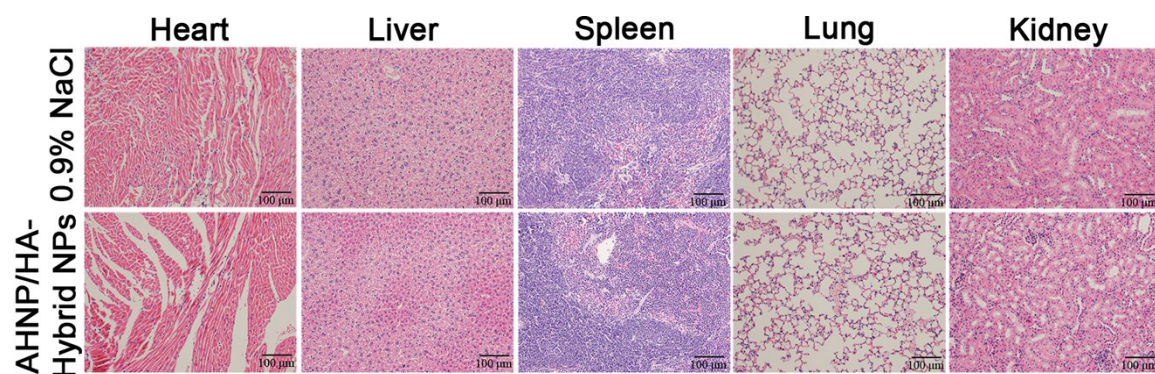

**Figure S3.** H&E staining analysis of the main organs slices from mice on day 18 after the treatment of 0.9% NaCl and AHNP/HA-Hybrid NPs at SN38 dose of 10 mg/kg. (Scale bar: 100 µm)

## Supplementary Information

Figure S4

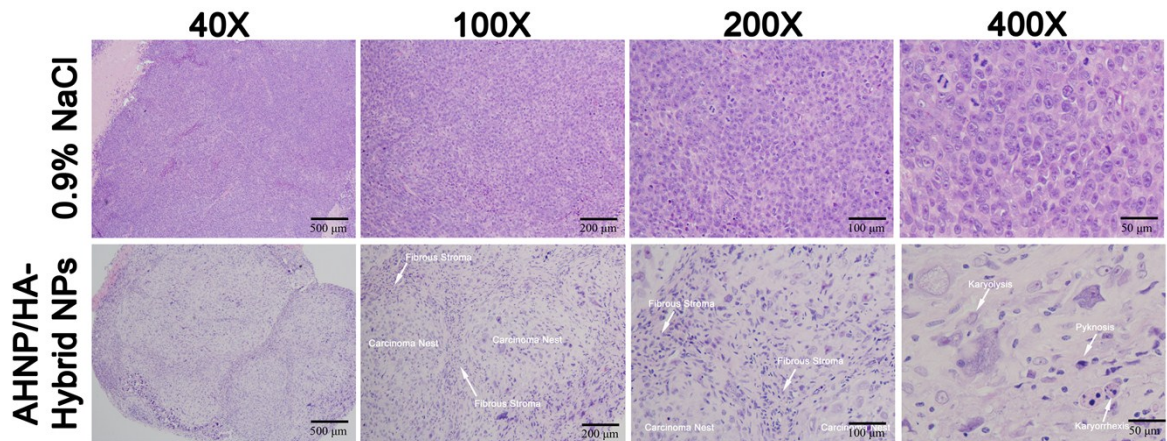

**Figure S4.** The images with different magnifications of the tumor slices from mice on day 18 after the first treatment of 0.9% NaCl and AHNP/HA-Hybrid NPs at SN38 dose of 10 mg/kg after H&E staining. The arrows indicate the pyknosis, the karyorrhexis, the karyolysis, the fibrous stroma and the carcinoma nest, respectively.
